# Supplementary material
Source: Springer Nature journal article supplement (https://www.springermedizin.de/resource/supplementary/12911_2013_699_MOESM2_ESM.pdf/9526470)

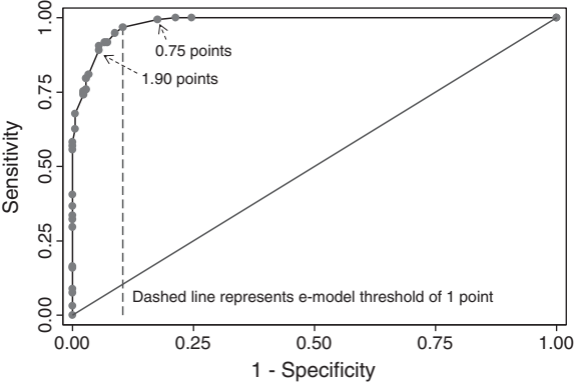

Supplement: MOESM2 [file 9526470]
